# Supplementary material
Source: PubMed Central journal article supplement (PMC1691312)
Supplement: 12737663s01.pdf [file 12737663s01.pdf]

This is an electronic appendix to the paper by Ferenci *et al.* The influence of cellular physiology on the initiation of mutational pathways in *Escherichia coli* populations. *Proc. R. Soc. Lond. B* **270**, 843—848.

Electronic appendices are refereed with the text. However, no attempt is made to impose a uniform editorial style on the electronic appendices.

Electronic Appendix A Sequenced *mgI* mutations in four chemostats running at  $D = 0.1 \text{ h}^{-1}$

| Isolates in population 1 | Mutation         | Isolates in population 2 | Mutation           | Isolates in population 3 | Mutation       | Isolates in population 4 | Mutation         |
|--------------------------|------------------|--------------------------|--------------------|--------------------------|----------------|--------------------------|------------------|
| 1Da1                     | A39D (C > A)     | 2Da6                     | V148G (T > G)      | 3Da1                     | MgIO TCA/TTA   | 4Da1                     | R326S (C > A)    |
| 1Da2                     | A252T (G > A)    | 2Fa1                     | V148G (T > G)      | 3Da7                     | MgIO (TCA/TTA) | 4Da2                     | R326S (C > A)    |
| 1Da5                     | H122Q (C > A)    | 2Fa4                     | S183F (C > T)      | 3Da8                     | H122Q (C > A)  | 4Da3                     | R326S (C > A)    |
| 1Da6                     | L111stop (T > G) | 2Fa5                     | MgIO (ATG/ATA)     | 3Fa1                     | MgIO (TCA/TTA) | 4Da4                     | R326S (C > A)    |
| 1Ea1                     | A80T (G > A)     | 2Fa6                     | V148G (T > G)      | 3Fa2                     | MgIO (TCA/TTA) | 4Da6                     | L298stop (T > G) |
| 1Ea2                     | S328F (C > T)    | 2Fa7                     | V148G (T > G)      | 3Fa3                     | MgIO (TCA/TTA) | 4Da7                     | R326S (C > A)    |
| 1Ea3                     | L265stop (T > G) | 2Fa8                     | A49A (C deletion)  | 3Fa4                     | MgIO (TCA/TTA) | 4Fa1                     | R326S (C > A)    |
| 1Ea4                     | L265stop (T > G) | 2Ga1                     | T168K (C > A)      | 3Fa5                     | MgIO (TCA/TTA) | 4Fa2                     | R326S (C > A)    |
| 1Ea5                     | IS (750-800bp)   | 2Ga2                     | S183F (C > T)      | 3Fa6                     | MgIO (TCA/TTA) | 4Fa3                     | R326S (C > A)    |
| 1Ea6                     | A252T (G > A)    | 2Ga5                     | MgIO (ATG/ATA)     | 3Fa7                     | IS (750-800bp) | 4Fa4                     | R326S (C > A)    |
| 1Ea7                     | Y181N (T > A)    | 2Ga6                     | IS (approx 1300bp) | 3Fa8                     | MgIO (TCA/TTA) | 4Fa5                     | R326S (C > A)    |
| 1Ea8                     | S183F (C > T)    | 2Ha2                     | MgIO (ATG/ATA)     | 3Ga1                     | MgIO (TCA/TTA) | 4Fa6                     | R326S (C > A)    |
| 1Ja1                     | L172P (T > C)    | 2Ha8                     | IS (approx 1300bp) | 3Ga2                     | MgIO (TCA/TTA) | 4Fa7                     | R326S (C > A)    |

|             |                |  |  |  |  |  |             |             |
|-------------|----------------|--|--|--|--|--|-------------|-------------|
| <b>1Ja3</b> | MgIO (CCG>CCT) |  |  |  |  |  | <b>4Fa8</b> | R326S (C>A) |
| <b>1Ja4</b> | IS (750-800bp) |  |  |  |  |  | <b>4Ha1</b> | R326S (C>A) |
| <b>1Ka4</b> | MgIO (CCG>CCT) |  |  |  |  |  | <b>4Ha3</b> | R326S (C>A) |
| <b>1Ka8</b> | MgIO (CCG>CCT) |  |  |  |  |  | <b>4Ha5</b> | R326S (C>A) |

Electronic Appendix B Sequenced *mgI* mutations in four chemostats running at  $D = 0.6 \text{ h}^{-1}$

| <b>Isolates in population 5</b> | <b>Mutation</b> | <b>Isolates in population 8</b> | <b>Mutation</b> | <b>Isolates in population 10</b> | <b>Mutation</b>               | <b>Isolates in population 11</b> | <b>Mutation</b> |
|---------------------------------|-----------------|---------------------------------|-----------------|----------------------------------|-------------------------------|----------------------------------|-----------------|
| <b>5U1</b>                      | MgIO (TCA/TTA)  | <b>8Q8</b>                      | MgIO (ATG/ATA)  | <b>10S5</b>                      | IS (approx 1300bp)            | <b>11L1</b>                      | R326C (C>T)     |
| <b>5U4</b>                      | MgIO (TCA/TTA)  | <b>8S3</b>                      | MgIO (ATG/ATA)  | <b>10T1</b>                      | T342S (G insert)<br>(ACA/AGC) | <b>11L3</b>                      | R326C (C>T)     |
| <b>5U8</b>                      | MgIO (TCA/TTA)  | <b>8S6</b>                      | MgIO (ATG/ATA)  | <b>10T2</b>                      | IS (approx 1300bp)            | <b>11L4</b>                      | R326C (C>T)     |
| <b>5V1</b>                      | MgIO (TCA/TTA)  | <b>8V2</b>                      | MgIO (ATG/ATA)  | <b>10T4</b>                      | L231P (T>C)                   | <b>11M1</b>                      | R326C (C>T)     |
| <b>5V4</b>                      | IS (750-800bp)  | <b>8V3</b>                      | MgIO (ATG/ATA)  | <b>10T5</b>                      | Q305stop (C>T)                | <b>11M2</b>                      | R326C (C>T)     |
| <b>5V5</b>                      | MgIO (TCA/TTA)  | <b>8V6</b>                      | MgIO (CCG/CAG)  | <b>10T6</b>                      | IS (750-800bp)                | <b>11M3</b>                      | R326C (C>T)     |
| <b>5V6</b>                      | MgIO (TCA/TTA)  | <b>8V7</b>                      | MgIO (ATG/ATA)  | <b>10T7</b>                      | P283Q (C>A)                   | <b>11M4</b>                      | R326C (C>T)     |
| <b>5V7</b>                      | A296E (C>A)     | <b>8V8</b>                      | MgIO (ATG/ATA)  | <b>10U1</b>                      | IS (approx 1300bp)            | <b>11M5</b>                      | R326C (C>T)     |
| <b>5V8</b>                      | MgIO (TCA/TTA)  |                                 |                 | <b>10U2</b>                      | P283Q (C>A)                   | <b>11M6</b>                      | R326C (C>T)     |
| <b>5W3</b>                      | MgIO (TCA/TTA)  |                                 |                 | <b>10U4</b>                      | IS (approx 1300bp)            | <b>11M7</b>                      | R326C (C>T)     |

|  |  |  |  |  |             |                    |             |       |       |
|--|--|--|--|--|-------------|--------------------|-------------|-------|-------|
|  |  |  |  |  | <b>10U5</b> | MgIO (CTT/CCT)     | <b>11M8</b> | R326C | (C>T) |
|  |  |  |  |  | <b>10U6</b> | P283Q (C>A)        |             |       |       |
|  |  |  |  |  | <b>10U7</b> | IS (approx 1300bp) |             |       |       |
|  |  |  |  |  | <b>10U8</b> | S19Y (C>A)         |             |       |       |
